# Supplementary material
Source: Royal Society of Chemistry journal article supplement (doi:10.1039/d5gc05937b)
Supplement: d5gc05937b2.pdf [file d5gc05937b2.pdf]

|    |                                                                       |
|----|-----------------------------------------------------------------------|
| 26 |                                                                       |
| 27 |                                                                       |
| 28 | <b>INDEX</b>                                                          |
| 29 |                                                                       |
| 30 | S1. Chemicals                                                         |
| 31 | S2. Synthesis procedure and characterization details of ZIF-8 samples |
| 32 | S3. NMR characterization of DMC/MeOH 1:1 mixture                      |
| 33 | S4. ZIF-8 characterization and results                                |
| 34 | S4.1 ZIF-8 prepared in DMC/MeOH 2:1                                   |
| 35 | S4.2 ZIF-8 prepared in DMC/MeOH 1:1                                   |
| 36 | S4.3 ZIF-8 prepared in DMC/MeOH 1:2                                   |
| 37 | S4.4 ZIF-8 prepared in DMC                                            |
| 38 | S5. Stability of ZIF-8 samples                                        |
| 39 | S5.1 Structural stability overtime : XRPD after 60 days               |
| 40 | S5.2 Thermal stability: TG analysis                                   |
| 41 | S6. ZIF-8 synthesis in recycled DMC                                   |
| 42 | S7. Sustainability assessment                                         |
| 43 | S7.1 Green metrics                                                    |
| 44 | S7.2 LCA                                                              |
| 45 | S8. Computational details                                             |
| 46 | S9. TEM analyses                                                      |
| 47 | <u>References</u>                                                     |
| 48 |                                                                       |
| 49 |                                                                       |

## 50 S1. Chemicals

51 Zinc acetate dihydrate (>99%,  $\text{Zn}(\text{CH}_3\text{COO})_2 \cdot 2\text{H}_2\text{O}$ , CAS: 5870-45-6), 2-methylimidazole (99%,  
52  $\text{C}_4\text{H}_6\text{N}_2$ , CAS: 693-98-1), sodium hydroxide (>98%, NaOH, CAS: 1310-73-2), dimethyl carbonate  
53 (99%,  $\text{C}_3\text{H}_6\text{O}_3$ , CAS: 616-38-6), methanol ( $\text{CH}_3\text{OH}$ , CAS: 67-56-1), chloroform-d (>99%,  $\text{CDCl}_3$ ,  
54 CAS: 865-49-6 ) were purchased from Sigma Aldrich and used without further purification.  
55 Dimethyl carbonate/methanol mixtures with DMC/MeOH 1:2 and 2:1 molar composition were  
56 prepared by mixing the appropriate volumes of the two solvents. The 1:1 DMC/MeOH molar  
57 mixture was directly obtained as a by-product during the synthesis of glycerol carbonate (GlyC)  
58 through transcarbonatation of glycerol with dimethyl carbonate, as detailed in our previous  
59 work.<sup>1</sup> Table S1 summarizes the main properties of the solvents used in the solvothermal  
60 preparation of ZIF-8.

61 **Table S1.** Comparison of the main properties of solvents used for ZIF-8 synthesis, including  
62 traditional solvents (DMF, MeOH,  $\text{H}_2\text{O}$ ) and alternative carbonate-based systems (GlyC and  
63 DMC).

| Solvent                           | Boiling point<br>at 1 atm (°C) | Dielectric constant<br>at 20°C ( $\epsilon$ ) | Dipole<br>moment (D) | Viscosity (mPa·s at<br>25°C) | Density ( $\text{g cm}^{-3}$ at<br>25°C) |
|-----------------------------------|--------------------------------|-----------------------------------------------|----------------------|------------------------------|------------------------------------------|
| DMF <sup>2</sup>                  | 153                            | 36.7                                          | 3.8                  | 0.82                         | 0.945                                    |
| MeOH <sup>2</sup>                 | 64                             | 32.6                                          | 1.7                  | 0.6                          | 0.792                                    |
| $\text{H}_2\text{O}$ <sup>2</sup> | 100                            | 79.7                                          | 1.87                 | 0.89                         | 0.998                                    |
| glyC <sup>3,4</sup>               | 110<br>(0.1 mmHg)              | 111.5                                         | 5.05                 | 85.4                         | 1.40                                     |
| DMC <sup>5</sup>                  | 90.3                           | 3.1                                           | 0.91                 | 0.585                        | 1.07                                     |

64

65

## 66 S2. Synthesis and characterization of ZIF-8 samples

67 In this study, the  $\text{Zn}^{2+}$ : 2-methylimidazololate (2-mIM ) molar ratio was initially set, considering the  
68 reaction stoichiometry, to 1:2. For each experiment, two separate starting solutions were prepared  
69 by dissolving a proper amount of each reagent precursor ( $\text{Zn}(\text{CH}_3\text{COO})_2 \cdot 2\text{H}_2\text{O}$  and 2-mIM in the  
70 same amount of the selected solvent, either DMC or a specific DMC/MeOH mixture, in order to

71 obtain the final concentrations reported in Table S2. Dissolution was favored by sonicating the  
72 solutions at room temperature for 1 minute. After that, the two precursors' solutions were  
73 combined in a one-necked glass flask, followed by the addition of a few  $\mu\text{L}$  of a 4 M NaOH  
74 aqueous solution. Each reaction was conducted for 1 hour at two different temperatures, namely  
75 room temperature and 60  $^{\circ}\text{C}$ , using a heating plate with a magnetic stirrer. All experimental  
76 procedures were performed under air and without any reagent/solvent pretreatment.

77 As a representative example (see entry 7 in Table S2), 0.1098g of zinc acetate dihydrate and  
78 0.0821g of 2-mIM were dissolved separately in 50mL of the 2:1 DMC/MeOH molar mixture,  
79 corresponding to a final concentration of 5 mM and 10mM in 100 mL, respectively. The two  
80 solutions were then combined, and 250  $\mu\text{L}$  of a 4 M NaOH aqueous solution was added to reach a  
81 final NaOH concentration of 10 mM in the reaction mixture.

82 The as-obtained precipitate was allowed to settle and cool down for 10 minutes, and the generated  
83 particles were collected by centrifugation at 4000 rpm for 5 minutes. After the removal of the  
84 mother liquor, the precipitates were subsequently rinsed with 5 mL of methanol to remove any  
85 unreacted species or by-products. For each sample, three washings were carried out, and then the  
86 purified product was dried in an oven at 80  $^{\circ}\text{C}$  for 12 hours. The isolated solid products were  
87 weighed after drying, and the corresponding reaction yields were calculated using the equation  
88 reported below:

$$89 \quad \text{Yield}(\%) = \frac{\text{experimental obtained mass ZIF-8 (g)}}{\text{theoretic mass ZIF-8 (g)}} \times 100$$

90 The full set of reaction conditions tested in this study is summarized in Table S2.

91  
92  
93  
94  
95  
96  
97  
98  
99

100

101 **Table S2.** ZIF-8 experimental synthesis conditions.

102

103

| Entry | [Zn <sup>2+</sup> ]<br>(mM) | [2-mIm]<br>(mM) | C <sub>NaOH</sub><br>(mM) | Solvent           | V<br>(mL) | T<br>(°C) | t<br>(h) |
|-------|-----------------------------|-----------------|---------------------------|-------------------|-----------|-----------|----------|
| 1     | 20                          | 40              | 10                        | DMC/MeOH<br>(2:1) | 50        | 60        | 1        |
| 2     | 20                          | 40              | 10                        | DMC/MeOH<br>(2:1) | 50        | RT        | 1        |
| 3     | 10                          | 20              | 10                        | DMC/MeOH<br>(2:1) | 50        | 60        | 1        |
| 4     | 10                          | 20              | 10                        | DMC/MeOH<br>(2:1) | 50        | RT        | 1        |
| 5     | 10                          | 20              | 20                        | DMC/MeOH<br>(2:1) | 50        | 60        | 1        |
| 6     | 10                          | 20              | 20                        | DMC/MeOH<br>(2:1) | 50        | RT        | 1        |
| 7     | 5                           | 10              | 10                        | DMC/MeOH<br>(2:1) | 100       | 60        | 1        |
| 8     | 5                           | 10              | 10                        | DMC/MeOH<br>(2:1) | 100       | RT        | 1        |
| 9     | 5                           | 10              | 10                        | DMC/MeOH<br>(1:1) | 100       | 60        | 1        |
| 10    | 5                           | 10              | 10                        | DMC/MeOH<br>(1:1) | 100       | RT        | 1        |
| 11    | 5                           | 10              | 10                        | DMC/MeOH<br>(1:2) | 100       | 60        | 1        |
| 12    | 5                           | 10              | 10                        | DMC/MeOH<br>(1:2) | 100       | RT        | 1        |
| 13    | 10                          | 20              | 20                        | DMC               | 50        | 60        | 1        |
| 14    | 10                          | 20              | 20                        | DMC               | 50        | RT        | 1        |
| 15    | 5                           | 10              | 10                        | DMC               | 100       | 60        | 1        |
| 16    | 5                           | 10              | 10                        | DMC               | 100       | RT        | 1        |

104

105 Each ZIF-8 sample was stored in powder form for characterizations and gas adsorption tests.

106 **Characterization details**

107 The synthesis of ZIF-8 was confirmed using X-ray powder diffraction (XRPD) measurements, the  
108 specific surface area and pore size distribution were provided by the nitrogen  
109 adsorption/desorption isotherm data evaluated via Brunauer-Emmet-Teller (BET) and Non-Local  
110 Density Functional Theory (NLDFT) methods, respectively, and the thermal stability was  
111 investigated by thermogravimetric analysis (TGA).

112 In detail, the XRPD diffractograms were collected using a Bruker D2 PHASER X-ray powder  
113 diffractometer at room temperature. The measurements were conducted using a standard  $\text{CuK}\alpha$   
114 beam ( $\lambda = 1.5418 \text{ \AA}$ ) as a radiation source, at 30 kV accelerating voltage and 10mA current. The  
115 scans were carried out on as-synthesized samples in  $2\theta$  range of  $5\text{-}40^\circ$  with a step size of  $0.016^\circ$  in  
116  $2\theta$  and an acquisition step-time of 2.6 s. Data was processed with Origin Pro 2018 software.

117  $\text{N}_2$  adsorption-desorption measurements were performed on a Quantachrome NOVA 4200e  
118 instrument using nitrogen gas at 77K. Prior to analysis, samples (20 mg) were outgassed under  
119 vacuum at  $150^\circ\text{C}$  for 1h. BET specific surface areas were calculated from the adsorption branch  
120 in the relative pressure range from 0.003 to 0.05. For a direct comparison with literature data,  
121 BET-derived SSA were reported for all samples. The NLDFT equilibrium model was used for the  
122 determination of the pore size distribution (PSD), over the full relative pressure range ( $P/P_0 = 0.00\text{-}$   
123  $1.00$ ). The total pore volume was derived from the amount of nitrogen adsorbed at  $P/P_0 = 0.99$ ,  
124 corresponding to the cumulative pore volume.

125 TGA data were recorded using a TA instrument, TGA Q500 V20.13 series. All samples were held  
126 in alumina pans and heated over a temperature range from  $25^\circ\text{C}$  to  $800^\circ\text{C}$ , with a heating rate of  
127  $10^\circ\text{C min}^{-1}$ , under a continuous flow of nitrogen gas.

128 The morphology of the samples was investigated with a FEG LEO 1525 scanning electron  
129 microscope (FE-SEM). FE-SEM micrographs were collected after depositing the samples on a  
130 stub and sputter coating with chromium for 20 seconds.

131

132

133

134

135

136

137

138

139

140

141 **S3. NMR characterization of the DMC/MeOH waste mixture**

142 NMR spectra of solvents were performed in  $\text{CDCl}_3$  at room temperature on a Bruker Avance-400  
143 MHz spectrometer ( $^1\text{H}$ : 400.13;  $^{13}\text{C}$ : 100.61). The resonances are reported in ppm ( $\delta$ ). Spectra  
144 recording was performed using Bruker TopSpin v2.1 software. Data processing was performed  
145 using TopSpin v4.1.4 software.

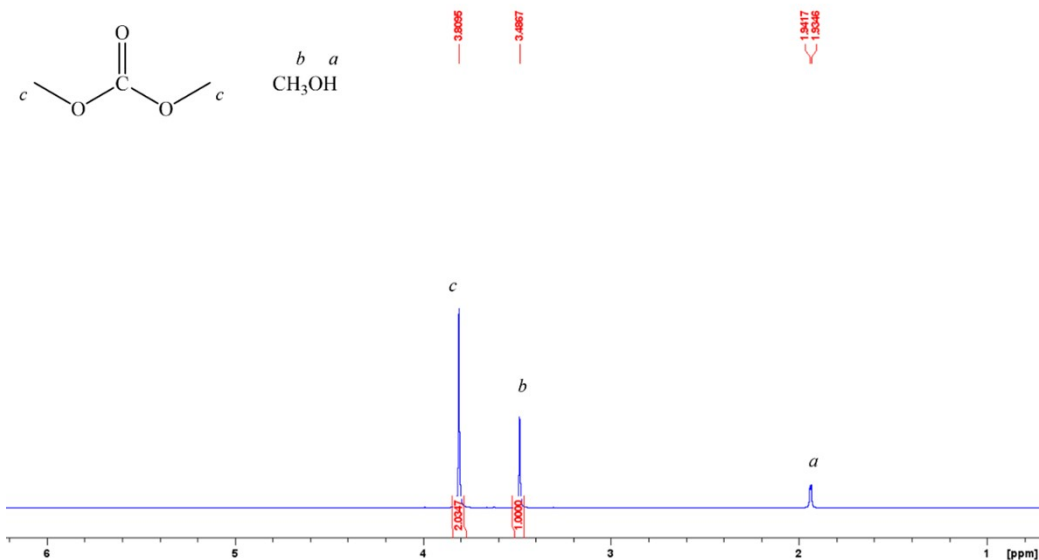

146

147 **Figure S1.  $^1\text{H}$  NMR of DMC/MeOH 1:1 mixture**

147

148

$^1\text{H}$  NMR (400MHz,  $\text{CDCl}_3$ , 298K),  $\delta$ : 1.94 (*Ha*); 3.49 (s,3H;*Hb*); 3.80 (s,6H;*Hc*).

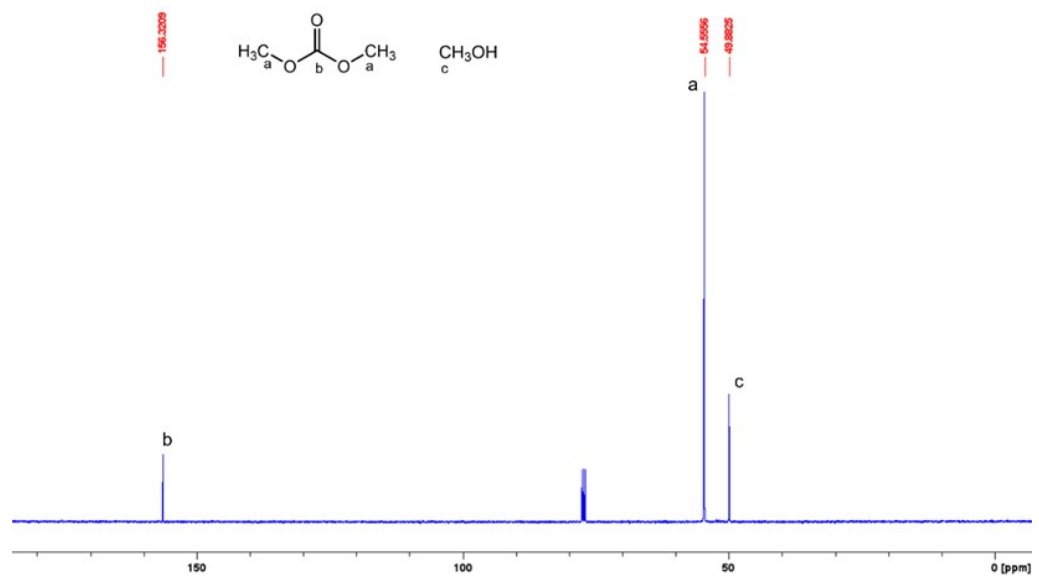

149

150 **Figure S2.  $^{13}\text{C}$  NMR of DMC/MeOH 1:1 mixture**

150

151

$^{13}\text{C}$  NMR (400MHz,  $\text{CDCl}_3$ , 298K),  $\delta$ : 49.88 (*Cc*); 54.55 (2C; *Ca*); 156.32 (*Cb*).

152 **S4. ZIF-8 characterizations**

153 **S4.1 ZIF-8 synthesis in DMC/MeOH 2:1**

154 All the preliminary experiments in the DMC/MeOH 2:1 molar mixture are reported in Table S3,  
155 along with the corresponding reaction yields, specific surface area and pore volume values.

156 **Table S3.** Characterization of ZIF-8 synthesized in DMC/MeOH 2:1.

157

| 158 Entry | ZIF-8<br>formation <sup>[a]</sup>                                                   | Yield (%) | BET SSA<br>(m <sup>2</sup> g <sup>-1</sup> ) | Total pore<br>volume (cc g <sup>-1</sup> ) |
|-----------|-------------------------------------------------------------------------------------|-----------|----------------------------------------------|--------------------------------------------|
| 159 1     |    | 51.1      | 1580                                         | 0.60                                       |
| 160 2     |    | -         | -                                            | -                                          |
| 161 3     |    | 41.8      | 1235                                         | 0.63                                       |
| 162 4     |    | -         | -                                            | -                                          |
| 163 5     |    | 97.2      | 770                                          | 0.32                                       |
| 164 6     |   | -         | -                                            | -                                          |
| 165 7     |  | 97.5      | 921                                          | 0.38                                       |
| 166 8     |  | 86.2      | 1350                                         | 0.51                                       |

167

168 [a] Confirmed by XRPD analysis  
169 Reaction conditions are reported in Table S2.  
170

171 XRPD analysis shown in Figure S3 confirmed the formation of the characteristic sodalite-type  
172 structure for each sample, with reflections at 2 $\theta$  values of 7.3°, 10.4°, 12.7°, 14.7°, 16.4°, and  
173 18.0°, corresponding to the (110), (200), (211), (220), (310), and (222) crystallographic planes.<sup>6</sup>

174 All BET isotherms shown in Figure S4 exhibited a Type I shape according to the IUPAC  
175 classification, a typical behavior for microporous materials. The initial rise in nitrogen adsorption  
176 corresponds to the filling of micropores (< 2 nm) in the ZIF-8 structure. The PSD, in the insert,  
177 showed a narrow and sharp peak centered around 0.616 nm half pore width, which is consistent  
178 with the expected ZIF-8 pore size.<sup>7</sup>

179

180

181

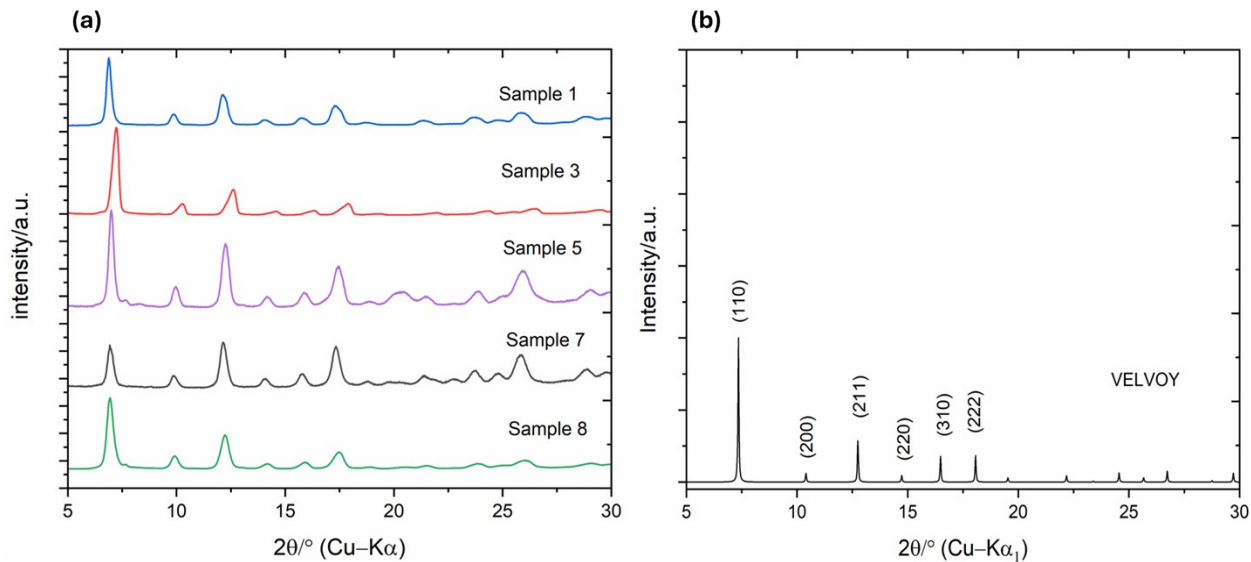

182

183 **Figure S3.** XRPD diffraction patterns of a) the synthesized samples (entries 1, 3, 5, 7 and 8),

184

compared with b) the simulated ZIF-8 pattern (CCDC code VELVOY).

185

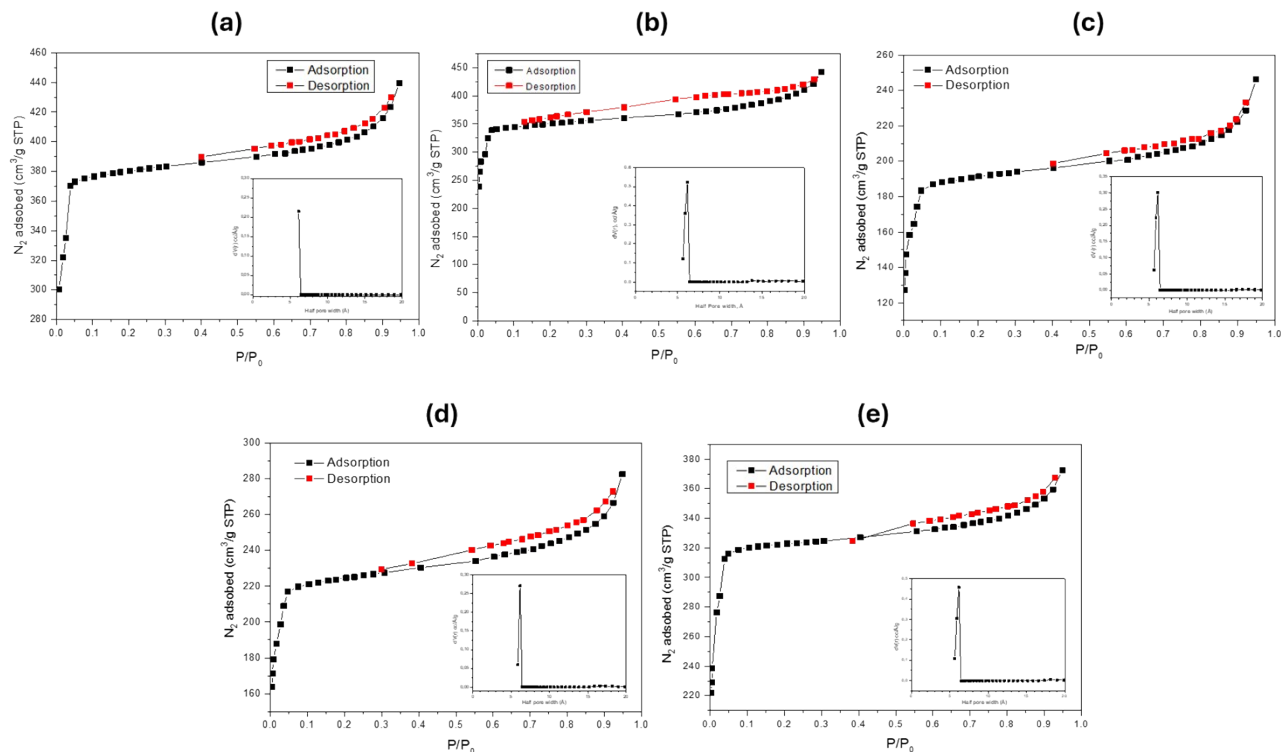

186

187 **Figure S4.**  $N_2$  adsorption/desorption isotherm and PSD curves of ZIF-8

188

a) sample 1, b) sample 3, c) sample 5, d) sample 7, e) sample 8.

189

## 190 S4.2 ZIF-8 synthesis in DMC/MeOH 1:1

191 All the experiments carried out in the DMC/MeOH 1:1 molar mixture are reported in Table S4,  
192 along with the corresponding reaction yields, specific surface area and pore volume values.

193 **Table S4.** Characterization of ZIF-8 synthesized in DMC/MeOH 1:1.

194

| 195 Entry | ZIF-8<br>formation <sup>[a]</sup>                                                 | Yield (%) | BET SSA<br>(m <sup>2</sup> g <sup>-1</sup> ) | Total pore<br>volume (cc g <sup>-1</sup> ) |
|-----------|-----------------------------------------------------------------------------------|-----------|----------------------------------------------|--------------------------------------------|
| 196 9     |  | 69.5      | 1147                                         | 0.51                                       |
| 197 10    |  | -         | -                                            | -                                          |

198 [a] Confirmed by XRPD analysis  
199 Reaction conditions are reported in Table S2.  
200  
201

## 202 S4.3 ZIF-8 synthesized in DMC/MeOH 1:2

203 All the experiments carried out in the DMC/MeOH 1:2 molar mixture are reported in Table S5,  
204 along with the corresponding reaction yields, specific surface area and pore volume values.

205 **Table S5.** Characterization of ZIF-8 synthesized in DMC/MeOH 1:2.

206

| 207 Entry | ZIF-8<br>formation <sup>[a]</sup>                                                   | Yield (%) | BET SSA<br>(m <sup>2</sup> g <sup>-1</sup> ) | Total pore<br>volume (cc g <sup>-1</sup> ) |
|-----------|-------------------------------------------------------------------------------------|-----------|----------------------------------------------|--------------------------------------------|
| 208 11    |  | -         | -                                            | -                                          |
| 209 12    |  | -         | -                                            | -                                          |

210 [a] Confirmed by XRPD analysis  
211 Reaction conditions are reported in Table S2.  
212  
213  
214

215 Neither of the two experiments resulted in ZIF-8 crystallization, as confirmed by XRPD analysis  
216 (Figure S5), where no ZIF-8 phase was observed for both samples. These results are consistent  
217 with the known behavior of methanol-rich systems, in which crystallization typically requires more  
218 demanding conditions (Zn/2-mIM 1:8 molar ratio, 24 h at RT or Zn/2-mIM 1:3 molar ratio, 15 h  
219 at 60 °C).<sup>8,9</sup>  
220  
221  
222

223

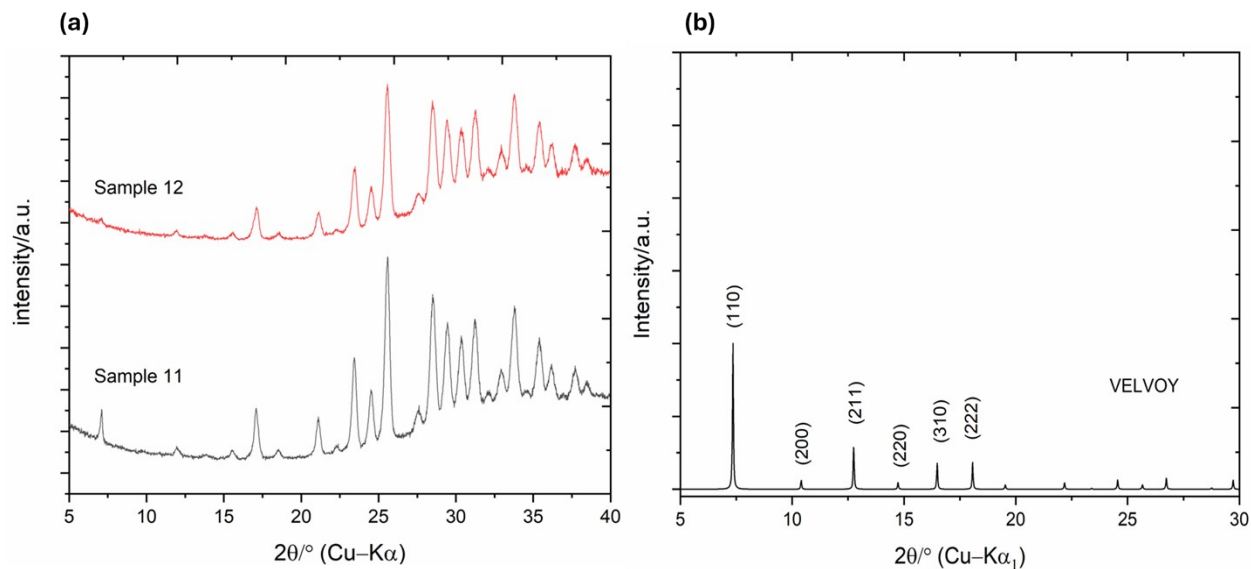

224

225 **Figure S5.** XRPD diffraction patterns of a) the synthesized samples (entries 11 and 12)  
 226 compared with b) the simulated ZIF-8 pattern (CCDC code VELVOY).

227 These results showed that the mild conditions employed in this study are not suitable for this  
 228 specific solvent mixture composition. However, this mixture was not further explored in the  
 229 present work, since MeOH-based systems have already been widely studied in the literature,  
 230 making this composition of lower interest in the context of developing alternative routes for ZIF-  
 231 8 synthesis.

#### 232 S4.4 ZIF-8 synthesis in DMC

233 All the experiments carried-out in pure DMC are reported in Table S6, along with the  
 234 corresponding reaction yields, specific surface area and pore volume values.

235 **Table S6.** Characterization of ZIF-8 synthesized in pure DMC.

236

237

238

239

240

241

242

243

244

| Entry | ZIF-8 formation <sup>[a]</sup> | Yield (%) | BET SSA (m <sup>2</sup> g <sup>-1</sup> ) | Total pore volume (cc g <sup>-1</sup> ) |
|-------|--------------------------------|-----------|-------------------------------------------|-----------------------------------------|
| 13    | ☒                              | -         | -                                         | -                                       |
| 14    | ☒                              | -         | -                                         | -                                       |
| 15    | ☒                              | -         | -                                         | -                                       |
| 16    | ☑                              | 91.3      | 1522                                      | 0.75                                    |

[a] Confirmed by XRPD analysis. Reaction conditions are reported in Table S2.

## 245 S5. Stability of ZIF-8 samples

### 246 S5.1 Structural stability overtime: XRPD after 60 days

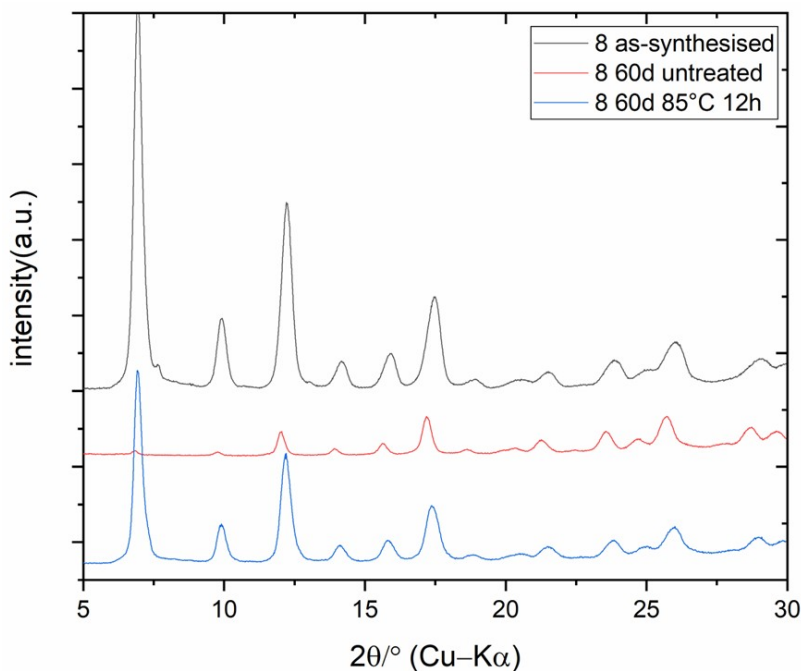

247

248 **Figure S6.** XRPD diffraction pattern of a ZIF-8 representative sample (sample 8) collected at  
249 different times: immediately after synthesis (black), after 60 days of storage at room temperature  
250 (red), and after 60 days followed by a thermal treatment at 85 °C for 12h (blue).

251 The XRPD pattern of ZIF-8 samples 8 is reported to evaluate its structural stability over time. The  
252 initial diffraction pattern (black) was obtained by performing the analysis on the as-synthesized  
253 powder samples, which were subsequently stored in glass vials at room temperature.

254 After 60 days from the synthesis, the sample was re-analyzed by XRPD both in its untreated state  
255 (red diffractogram) and after a thermal treatment in an oven at 85 °C for 12 hours (blue  
256 diffractogram). A comparative analysis of the red and blue spectra demonstrates that thermal  
257 treatment effectively reactivates the material, restoring all characteristic diffraction peaks. These  
258 results indicate that the synthesized ZIF-8 maintains its structural integrity over time under thermal  
259 activation conditions, without undergoing any degradation or requiring dry-state storage.

260

261

262

263 S5.1 Thermal stability: TG analysis

Sample 16

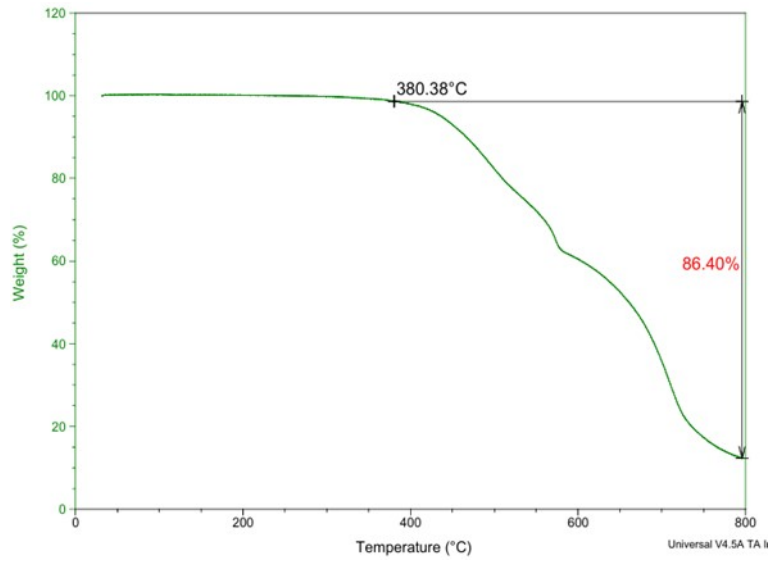

264

Sample 8

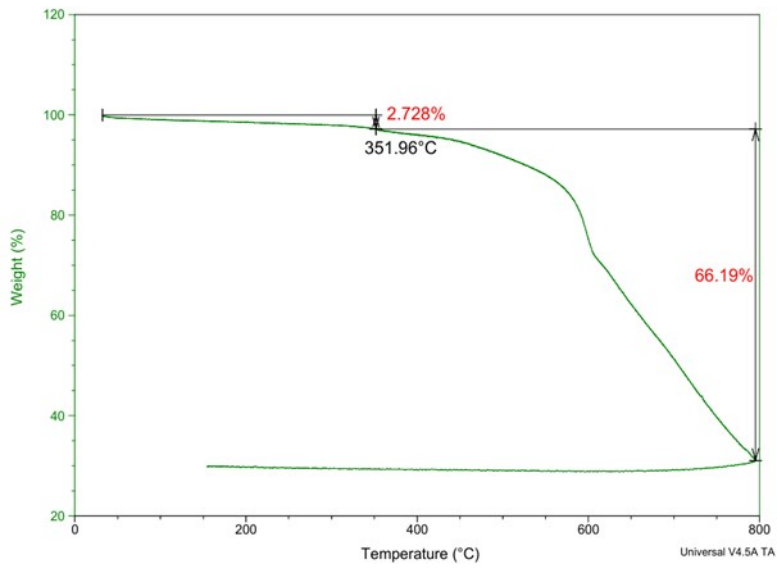

265

266

267

268

269

## Sample 9

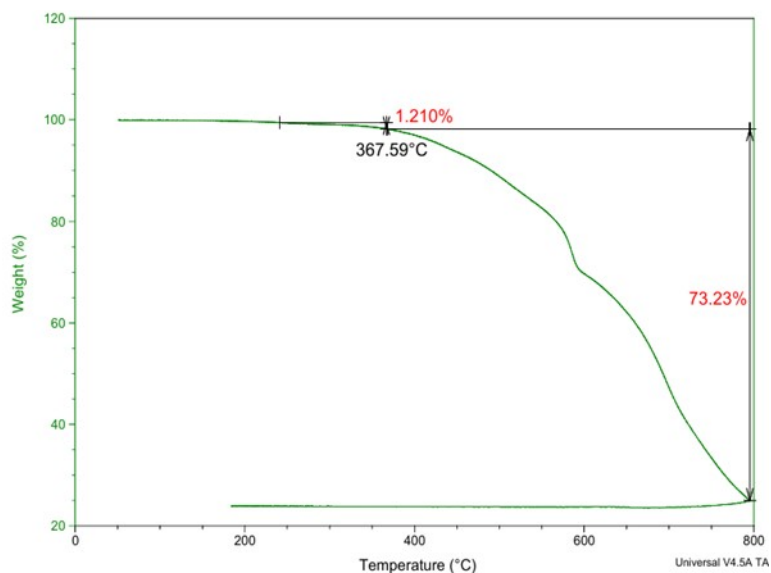

270

271 **Figure S7.** TGA scans of a representative ZIF-8 sample for each solvent/mixture employed for  
272 the synthesis.

273

274

275

276

277

278

279

280

281

282

283

284

285

286

287

288 **S6. ZIF-8 in recycled DMC**

289 In the solvent recycling experiments, after the first synthesis in fresh solvent (DMC), the mother  
290 liquor was recovered by centrifugation and filtered through a Nylon membrane filter (0.22  $\mu\text{m}$   
291 pore size) to remove suspended particles and aggregates. The filtered solvent was reused as  
292 reaction medium for a new ZIF-8 synthesis in an iterative procedure for two additional runs, using  
293 the same concentration of precursors and following the same procedure as the first synthesis  
294 conducted in fresh solvent.

295 In Figure S8 are shown ZIF-8 textural properties across all the synthesis cycles in recycled DMC.  
296

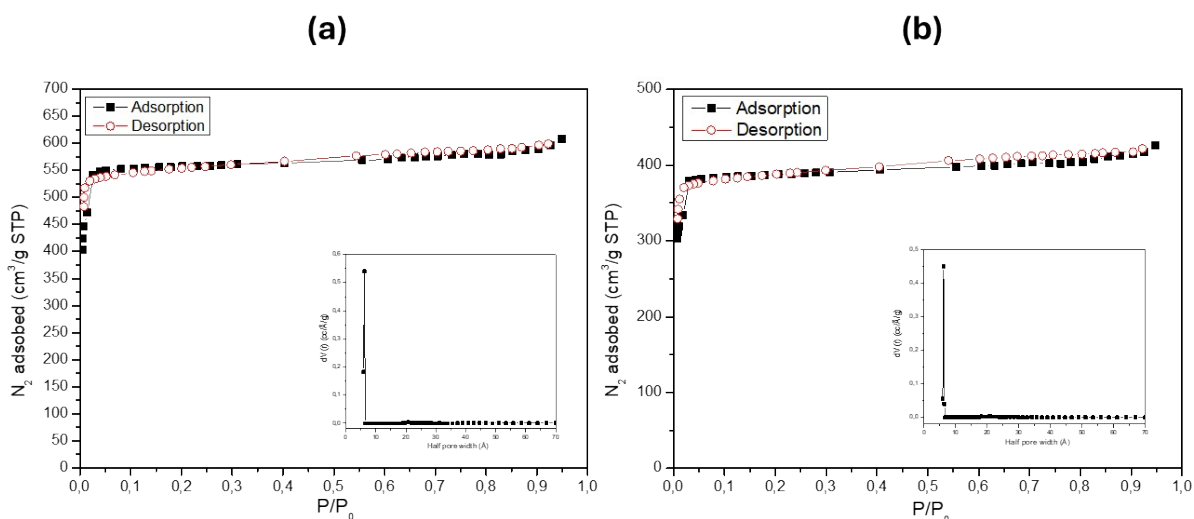

297

298 **Figure S8.**  $\text{N}_2$  adsorption/desorption isotherm and pore size distribution (PSD) (insert) of ZIF-8  
299 synthesized in recycled DMC (Samples a) 16-R<sub>1</sub>, b) 16-R<sub>2</sub>).

300

301

302

303

304

305

306

307

## 308 **S7. Green metrics evaluation and LCA**

### 309 **S7.1 Green metrics**

310 To evaluate the environmental impact of using DMC as an alternative solvent for ZIF-8 synthesis,  
311 green metrics like simple E-factor (sEF)<sup>10</sup> and Process Mass Intensity (PMI)<sup>11</sup> were calculated.  
312 These indicators quantify waste generation and overall mass efficiency for each synthesis.  
313 Additionally, PMI(r)<sup>11</sup> values were determined after each solvent recycling cycle. The obtained  
314 results were compared with literature data for ZIF-8 syntheses performed in DMF<sup>12</sup>, H<sub>2</sub>O<sup>13</sup>,  
315 MeOH<sup>9</sup>, and GlyC<sup>1</sup>.

316 This study used the following equations:

#### 317 **Simple E-Factor (sEF):**

$$318 \quad sEF = \frac{\Sigma m(\text{waste})}{\Sigma m(\text{product})}$$

319 It quantifies the amount of waste generated per gram of product, excluding solvents and water.

#### 320 **Process Mass Intensity (PMI):**

$$321 \quad PMI = \frac{\Sigma m(\text{materials in input})}{\Sigma m(\text{product})}$$

322 PMI measures the total input mass required per gram of product, including all reagents and  
323 solvents.

#### 324 **Process Mass Intensity after recycling (PMIr):**

$$325 \quad PMI(r) = \frac{\Sigma m(\text{materials in input}) - m(\text{recovered species})}{\Sigma m(\text{product})}$$

326 PMIr considers material recycling within the process, giving a more sustainable perspective on  
327 resource efficiency.

328

329

330

331

## 332 S7.2 LCA

### 333 Software and database

334 The ecoinvent database (v.3.7.1)<sup>14</sup> was used for the background data, with "market for" scenarios  
335 selected to capture the impacts associated with average transportation distances. The market  
336 dataset includes all the activities related to a product within a specified region, including average  
337 transport and additional inputs to account for trade and transport losses. The following selection  
338 criteria were applied: given the international geographic context, priority was given to global  
339 providers ({GLO}), or European providers ({RER}) when {GLO} was unavailable. The  
340 Allocation at Point of Substitution (APOS, U) model was chosen, as it is considered the most  
341 conservative approach. This model allocates direct impacts based on physical flows, in contrast to  
342 other methodologies, such as consequential or cut-off approaches.

343 SimaPro software (v. 9.2.0.2)<sup>15</sup> served as the primary tool for the analysis. The harmonized life  
344 cycle impact assessment method ReCiPe 2016<sup>16</sup> was selected to assess potential environmental  
345 impacts. This method evaluates environmental effects across 18 categories at the midpoint, or  
346 "problem-oriented" level. The categories assessed include: Global Warming Potential (GWP),  
347 Stratospheric Ozone Depletion (SOD), Ionizing Radiation (IR), Ozone Formation, Human Health  
348 (OF\_HH), Fine Particulate Matter Formation (FPMF), Ozone Formation, Terrestrial Ecosystems  
349 (OF\_TE), Terrestrial Acidification (TA), Freshwater Eutrophication (FE), Marine Eutrophication  
350 (ME), Terrestrial Ecotoxicity (TET), Freshwater Ecotoxicity (FET), Marine Ecotoxicity (MET),  
351 Human Carcinogenic Toxicity (HCT), Human Non-Carcinogenic Toxicity (HNCT), Land Use  
352 (LU), Mineral Resource Scarcity (MRS), Fossil Resource Scarcity (FRS), and Water Consumption  
353 (WC). These categories can be further grouped into three endpoint-damage receptors: human  
354 health, ecosystems, and resource depletion. The endpoint method allows for the comparison of  
355 different processes based on a cumulative single score, which is here expressed in millipoints  
356 (mPt).

357

358

359

360 Scenarios depiction

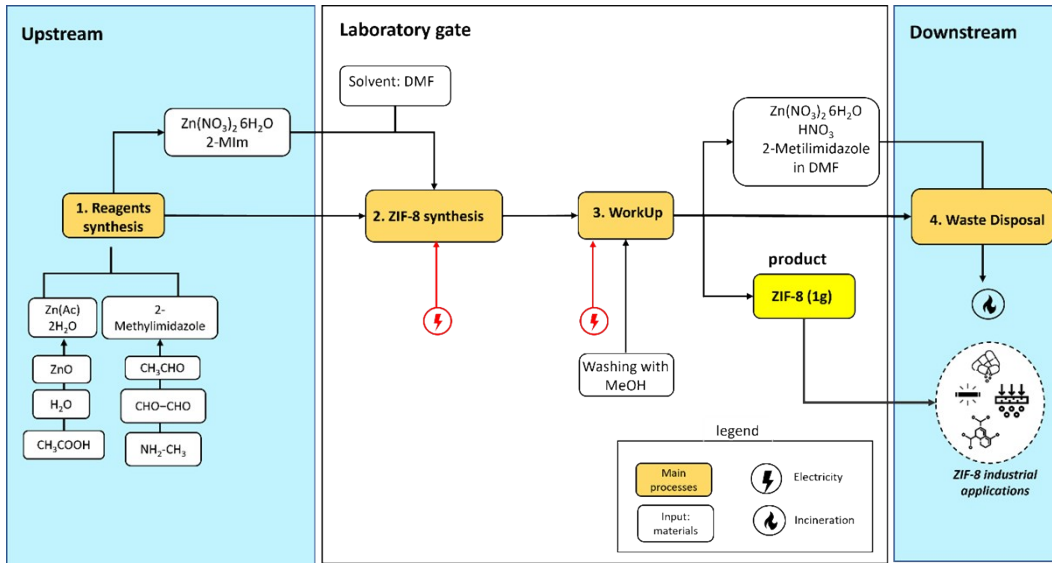

361

362

Figure S9. Flowchart for DMF-based scenario.

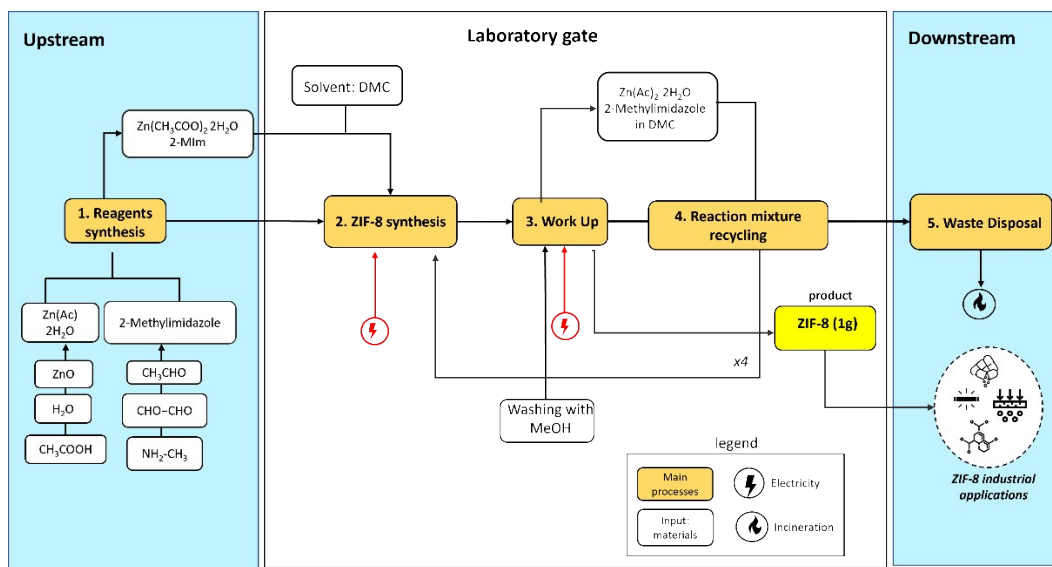

363

364

Figure S10. Flowchart for DMC-based scenario.

365

366

367

368

## 369 LCI (mass &amp; energy inventory)

370 Table S7. LCI for DMF scenario

| Item                          | Ecoinvent process                                                                                                                                            | Type of process | Quantity | Unit of measurement |
|-------------------------------|--------------------------------------------------------------------------------------------------------------------------------------------------------------|-----------------|----------|---------------------|
| 2-methylimidazole             | _2-Methylimidazole*                                                                                                                                          | INPUT           | 7.24     | g                   |
| Zinc nitrate hexahydrate      | _zinc nitrate 6 H <sub>2</sub> O*                                                                                                                            | INPUT           | 3.28     | g                   |
| N,N-dimethylformamide (DMF)   | <i>N, N-dimethylformamide {GLO}   market for   APOS, U</i>                                                                                                   | INPUT           | 51       | g                   |
| Electricity (ZIF-8 synthesis) | <i>Electricity, low voltage {GLO}   market group for   APOS, U</i>                                                                                           | INPUT           | 10.25    | kWh                 |
| Electricity (Work-up)         | <i>Electricity, low voltage {GLO}   market group for   APOS, U</i>                                                                                           | INPUT           | 3.23     | kWh                 |
| Washing with MeOH             | <i>Methanol {GLO}   market for   APOS, U</i>                                                                                                                 | INPUT           | 20       | g                   |
| Waste to incineration         | <i>spent solvent mixture {Europe without Switzerland}   treatment of spent solvent mixture, hazardous waste incineration, with energy recovery   APOS, U</i> | OUTPUT (waste)  | 60.39    | g                   |

371

372

373 Table S8. LCI for DMC scenario

| Item                          | Ecoinvent process                                                                                                                                            | Type of process | Quantity | Unit of measurement |
|-------------------------------|--------------------------------------------------------------------------------------------------------------------------------------------------------------|-----------------|----------|---------------------|
| 2-methylimidazole             | _2-Methylimidazole*                                                                                                                                          | INPUT           | 0.83     | g                   |
| Zinc acetate dihydrate        | _zinc acetate 2H <sub>2</sub> O                                                                                                                              | INPUT           | 1.10     | g                   |
| Dimethyl carbonate (DMC)      | <i>Dimethyl carbonate {GLO}   market for dimethyl carbonate   APOS, U</i>                                                                                    | INPUT           | 303.88   | g                   |
| Electricity (ZIF-8 synthesis) | <i>Electricity, low voltage {GLO}   market group for   APOS, U</i>                                                                                           | INPUT           | 3.94     | kWh                 |
| Electricity (Work-up)         | <i>Electricity, low voltage {GLO}   market group for   APOS, U</i>                                                                                           | INPUT           | 3.35     | kWh                 |
| Washing with MeOH             | <i>Methanol {GLO}   market for   APOS, U</i>                                                                                                                 | INPUT           | 70       | g                   |
| Waste to incineration         | <i>spent solvent mixture {Europe without Switzerland}   treatment of spent solvent mixture, hazardous waste incineration, with energy recovery   APOS, U</i> | OUTPUT (waste)  | 303.88   | g                   |

374 **Energy consumption data sheet**

375 For all calculations, standard laboratory instrument power has been considered. Also, the following  
 376 models for the instrument are: Hermle Labortechnik(centrifuge), Heidolph -MR Hei-Standard  
 377 (heating plate), Leroy Somer (vacuum pump), DERUI DR-MH60 (Ultrasonic cleaner),  
 378 GLOBEINSTRUMENTS (Oven).

379 For temperature allocation: power and time of usage were multiplied by the factor  $\Delta t/\Delta t_{max} =$   
 380  $(T_{reaction}-Text)/(T_{max}-Text)$ , where  $Text = T_{laboratory} = 19^{\circ}\text{C}$  ca.

381 **Table S9.** Laboratory equipment

| Parameter                 | Heating Plate<br>(Heidolph MR Hei-Standard) | Vacuum pump<br>(Leroy Somer) | Centrifuge<br>(Hermle Labortechnik) | Ultrasonic<br>(DERUI DR-MH60) | Oven<br>(GLOBE INSTRUMENTS) | Muffle<br>(Nabertherm) |
|---------------------------|---------------------------------------------|------------------------------|-------------------------------------|-------------------------------|-----------------------------|------------------------|
| Power                     | 0.825 kW                                    | 0.55 kW                      | 0.58 kW                             | 0.480 kW                      | 0.750 kW                    | 4.5 kW                 |
| Max Temperature<br>(Tmax) | 300 °C                                      | -                            | -                                   | -                             | 300 °C                      | 1000°C                 |
| Max Speed<br>(Speedmax)   | 1400 rpm                                    | -                            | 13500                               | -                             | -                           | -                      |

382

383

**Table S10.** Calculation setup for DMF scenario.

| Parameter       | ZIF-8 synthesis | Work Up ZIF-8 |
|-----------------|-----------------|---------------|
| T reaction (°C) | 140             | 120           |
| Time            | 24 h            | 12 h          |
| Energy          | 10.25           | 3.23          |

389

390

391

392

| Parameter                 | ZIF-8 synthesis | Work up ZIF-8 centrifugation | Work Up ZIF-8 Oven) | Precursors' solutions |
|---------------------------|-----------------|------------------------------|---------------------|-----------------------|
| T reaction (°C)           | RT              | -                            | 80                  | RT                    |
| Time                      | 1 h             | 10+4 min                     | 12 h                | 5-10 min              |
| Speed                     | 250 rpm         | 4000                         | -                   | -                     |
| $\Delta T/\Delta T_{max}$ | -               | -                            | 0.062               | -                     |
| Speed/Speed Max           | 0.18            | 0.30                         | -                   | -                     |
| Energy (kWh)              | 0.354           | 0.011                        | 3.35                | 0.000263              |

394 **Table S11.** Calculation setup for DMC scenario.

395

396 **Table S12.** LCIA for DMF based scenario (MidPoint categories).

| Impact category                         | Unit                  | 2-MIM   | Zn(NO <sub>3</sub> ) <sub>2</sub> | DMF     | Electricity for mixing | Washing with MeOH | Exiccation | Incineration |
|-----------------------------------------|-----------------------|---------|-----------------------------------|---------|------------------------|-------------------|------------|--------------|
| Global warming                          | kg CO <sub>2</sub> eq | 4.9E-02 | 6.4E-03                           | 1.6E-01 | 7.7E+00                | 1.4E-02           | 2.4E+00    | 1.2E-01      |
| Stratospheric ozone depletion           | kg CFC11 eq           | 1.3E-08 | 1.1E-07                           | 6.0E-08 | 3.2E-06                | 7.4E-09           | 1.0E-06    | 3.2E-08      |
| Ionizing radiation                      | kBq Co-60eq           | 4.6E-03 | 1.2E-04                           | 9.4E-03 | 9.3E-01                | 2.2E-04           | 2.9E-01    | 5.8E-04      |
| Ozone formation, Human health           | kg NO <sub>x</sub> eq | 7.6E-05 | 9.4E-06                           | 3.0E-04 | 1.7E-02                | 2.6E-05           | 5.3E-03    | 4.8E-05      |
| Fine particulate matter formation       | kg PM2.5 eq           | 4.8E-05 | 5.4E-06                           | 2.1E-04 | 1.7E-02                | 1.3E-05           | 5.3E-03    | 2.0E-05      |
| Ozone formation, Terrestrial ecosystems | kg NO <sub>x</sub> eq | 7.7E-05 | 9.6E-06                           | 3.0E-04 | 1.7E-02                | 2.6E-05           | 5.3E-03    | 4.8E-05      |
| Terrestrial acidification               | kg SO <sub>2</sub> eq | 1.4E-04 | 2.0E-05                           | 4.9E-04 | 2.6E-02                | 3.6E-05           | 8.1E-03    | 4.5E-05      |
| Freshwater eutrophication               | kg P eq               | 1.6E-05 | 9.4E-07                           | 5.7E-05 | 3.8E-03                | 1.7E-06           | 1.2E-03    | 2.4E-05      |

|                                 |                          |         |         |         |         |         |         |         |
|---------------------------------|--------------------------|---------|---------|---------|---------|---------|---------|---------|
| Marine eutrophication           | kg N eq                  | 2.6E-05 | 7.2E-08 | 1.6E-04 | 2.8E-04 | 1.3E-07 | 8.8E-05 | 2.3E-06 |
| Terrestrial ecotoxicity         | kg 1,4-DCB               | 4.6E-03 | 8.6E-02 | 7.8E-02 | 5.6E+00 | 4.2E-04 | 1.8E+00 | 2.4E-03 |
| Freshwater ecotoxicity          | kg 1,4-DCB               | 6.1E-05 | 2.4E-04 | 3.6E-04 | 4.3E-01 | 1.3E-05 | 1.4E-01 | 3.3E-05 |
| Marine ecotoxicity              | kg 1,4-DCB               | 6.5E-05 | 3.8E-04 | 2.8E-04 | 5.5E-01 | 1.6E-05 | 1.7E-01 | 4.8E-05 |
| Human carcinogenic toxicity     | kg 1,4-DCB               | 4.9E-04 | 3.4E-04 | 2.4E-05 | 3.9E-01 | 3.7E-06 | 1.2E-01 | 1.9E-05 |
| Human non-carcinogenic toxicity | kg 1,4-DCB               | 3.9E-04 | 8.9E-03 | 1.4E-03 | 6.5E+00 | 7.2E-05 | 2.1E+00 | 1.6E-04 |
| Land use                        | m <sup>2</sup> a crop eq | 3.2E-03 | 2.4E-04 | 9.4E-03 | 3.2E-01 | 3.3E-04 | 1.0E-01 | 5.5E-04 |
| Mineral resource scarcity       | kg Cu eq                 | 1.2E-04 | 1.9E-05 | 4.3E-04 | 7.8E-03 | 1.9E-05 | 2.5E-03 | 3.5E-05 |
| Fossil resource scarcity        | kg oil eq                | 2.6E-02 | 9.7E-04 | 8.1E-02 | 1.9E+00 | 1.5E-02 | 6.1E-01 | 3.9E-03 |
| Water consumption               | m <sup>3</sup>           | 9.1E-04 | 4.4E-05 | 2.0E-03 | 6.1E-02 | 8.4E-05 | 1.9E-02 | 1.6E-04 |

397

398 **Table S13.** LCIA for DMC based scenario (MidPoint categories).

| Impact category                         | Unit                  | 2-MIM    | Zn(AcO) <sub>2</sub> | DMC      | Electricity for mixing | Washing with MeOH | Exiccation | Incineration |
|-----------------------------------------|-----------------------|----------|----------------------|----------|------------------------|-------------------|------------|--------------|
| Global warming                          | kg CO <sub>2</sub> eq | 5.56E-03 | 1.35E-03             | 6.86E-01 | 2.94E+00               | 4.87E-02          | 2.50E+00   | 6.00E-01     |
| Stratospheric ozone depletion           | kg CFC11 eq           | 1.47E-09 | 6.48E-10             | 1.82E-07 | 1.22E-06               | 2.57E-08          | 1.04E-06   | 1.59E-07     |
| Ionizing radiation                      | kBq Co-60eq           | 5.28E-04 | 9.70E-05             | 4.91E-02 | 3.56E-01               | 7.81E-04          | 3.03E-01   | 2.93E-03     |
| Ozone formation, Human health           | kg NO <sub>x</sub> eq | 8.67E-06 | 3.36E-06             | 1.43E-03 | 6.41E-03               | 9.03E-05          | 5.46E-03   | 2.41E-04     |
| Fine particulate matter formation       | kg PM2.5 eq           | 5.46E-06 | 2.19E-06             | 8.19E-04 | 6.43E-03               | 4.55E-05          | 5.47E-03   | 1.01E-04     |
| Ozone formation, Terrestrial ecosystems | kg NO <sub>x</sub> eq | 8.84E-06 | 3.55E-06             | 1.51E-03 | 6.47E-03               | 9.20E-05          | 5.50E-03   | 2.41E-04     |
| Terrestrial acidification               | kg SO <sub>2</sub> eq | 1.64E-05 | 4.45E-06             | 1.78E-03 | 9.87E-03               | 1.25E-04          | 8.40E-03   | 2.24E-04     |
| Freshwater eutrophication               | kg P eq               | 1.83E-06 | 4.28E-07             | 2.06E-04 | 1.45E-03               | 5.78E-06          | 1.24E-03   | 1.22E-04     |

|                                 |                          |          |          |          |          |          |          |          |
|---------------------------------|--------------------------|----------|----------|----------|----------|----------|----------|----------|
| Marine eutrophication           | kg N eq                  | 3.01E-06 | 3.31E-08 | 1.88E-05 | 1.07E-04 | 4.61E-07 | 9.08E-05 | 1.15E-05 |
| Terrestrial ecotoxicity         | kg 1,4-DCB               | 5.29E-04 | 2.60E-02 | 6.12E-01 | 2.16E+00 | 1.49E-03 | 1.83E+00 | 1.19E-02 |
| Freshwater ecotoxicity          | kg 1,4-DCB               | 6.95E-06 | 7.97E-05 | 9.66E-04 | 1.67E-01 | 4.57E-05 | 1.42E-01 | 1.67E-04 |
| Marine ecotoxicity              | kg 1,4-DCB               | 7.46E-06 | 1.21E-04 | 1.26E-03 | 2.11E-01 | 5.55E-05 | 1.79E-01 | 2.43E-04 |
| Human carcinogenic toxicity     | kg 1,4-DCB               | 5.55E-05 | 1.22E-04 | 4.25E-04 | 1.51E-01 | 1.29E-05 | 1.29E-01 | 9.46E-05 |
| Human non-carcinogenic toxicity | kg 1,4-DCB               | 4.45E-05 | 2.76E-03 | 8.22E-03 | 2.51E+00 | 2.52E-04 | 2.13E+00 | 8.27E-04 |
| Land use                        | m <sup>2</sup> a crop eq | 3.71E-04 | 8.97E-05 | 4.53E-02 | 1.24E-01 | 1.14E-03 | 1.05E-01 | 2.74E-03 |
| Mineral resource scarcity       | kg Cu eq                 | 1.39E-05 | 5.01E-06 | 2.50E-03 | 3.01E-03 | 6.54E-05 | 2.56E-03 | 1.77E-04 |
| Fossil resource scarcity        | kg oil eq                | 2.93E-03 | 7.05E-04 | 3.41E-01 | 7.39E-01 | 5.29E-02 | 6.29E-01 | 1.94E-02 |
| Water consumption               | m <sup>3</sup>           | 1.04E-04 | 2.85E-05 | 6.65E-03 | 2.34E-02 | 2.96E-04 | 1.99E-02 | 8.06E-04 |

399

400 **Table S14.** LCIA for DMF based scenario (Endpoint categories).

| Impact category | Unit | 2-MIM    | Zn(NO <sub>3</sub> ) <sub>2</sub> | DMF      | Electricity for mixing | Washing with MeOH | Exiccation | Incineration |
|-----------------|------|----------|-----------------------------------|----------|------------------------|-------------------|------------|--------------|
| Total           | mPts | 1.70E+00 | 2.21E-01                          | 6.01E+00 | 3.64E+02               | 4.52E-01          | 1.12E+02   | 2.26E+00     |
| Human health    | mPts | 1.57E+00 | 2.12E-01                          | 5.62E+00 | 3.52E+02               | 9.04E-03          | 1.08E+02   | 2.15E+00     |
| Ecosystem       | mPts | 6.10E-02 | 7.55E-03                          | 1.92E-01 | 9.79E+00               | 6.60E-06          | 3.00E+00   | 9.94E-02     |
| Resources       | mPts | 6.60E-02 | 2.07E-03                          | 1.95E-01 | 2.63E+00               | 1.26E-08          | 8.05E-01   | 1.02E-02     |

401

402

403 **Table S15.** LCIA for DMC based scenario (Endpoint categories).

| Impact category | Unit | 2-MIM    | Zn(OAc) <sub>2</sub> | DMC      | Electricity for mixing | Washing with MeOH | Exiccation | Incineration |
|-----------------|------|----------|----------------------|----------|------------------------|-------------------|------------|--------------|
| Total           | mPts | 1.94E-01 | 6.57E-02             | 2.63E+01 | 1.36E+02               | 1.58E+00          | 1.16E+02   | 1.14E+01     |
| Human health    | mPts | 1.80E-01 | 6.20E-02             | 2.46E+01 | 1.31E+02               | 1.40E+00          | 1.12E+02   | 1.08E+01     |
| Ecosystem       | mPts | 6.96E-03 | 1.88E-03             | 8.49E-01 | 3.66E+00               | 5.11E-02          | 3.11E+00   | 5.00E-01     |
| Resources       | mPts | 7.53E-03 | 1.75E-03             | 8.68E-01 | 9.81E-01               | 1.33E-01          | 8.35E-01   | 5.12E-02     |

404

405

406

### 407 S8. Computational details.

408 All geometries were optimized with Gaussian16 package<sup>17</sup> and the B3LYP-D3(BJ) level of  
409 theory<sup>18,19</sup> was used to optimize the geometries of all minima and transition states. For Zn the quasi  
410 relativistic LANL2DZ ECP effective core potential was employed<sup>20</sup>, whereas the 6-311G\*\* basis  
411 set was used for the C, O, H, and N atoms. The reported free energies were obtained by adding  
412 gas-phase thermal corrections to the electronic energy in solvent (**polarizable continuum**  
413 model)<sup>21</sup> computed via single-point energy calculations in dimethyl carbonate (DMC) ( $\epsilon = 3.13$  at  
414 25°C) by using the same computational protocol previously described for the gas-phase  
415 calculations. The optimized minima and transition states were verified by harmonic vibrational  
416 analysis to have no and one proper imaginary frequency, respectively.

417

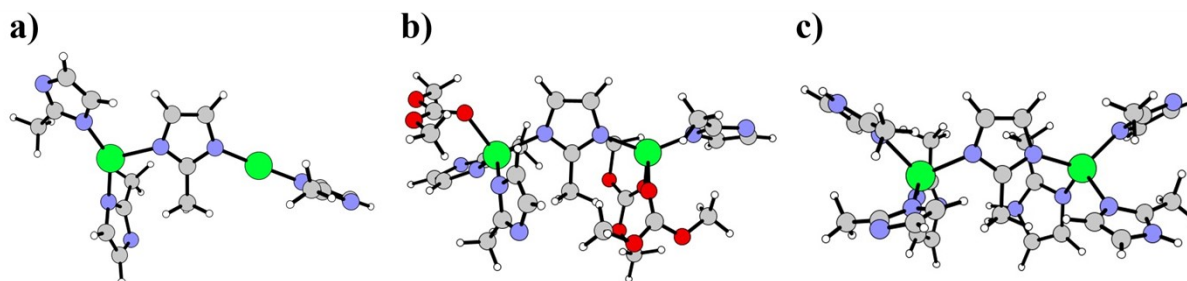

418

419 **Figure S11.** Optimized structures of a)  $\text{Zn}_2(\text{mIm})_4$ , b)  $\text{Zn}_2(\text{mIm})_4(\text{DMC})_3$  and c)  
420  $\text{Zn}_2(\text{mIm})_4(\text{Hmim})_3$ . The Zn, C, O, H and N atoms are reported in green, silver, red, white, and  
421 blue and depicted in ball and stick.

422

423

424

425

426

427

428

429

430

431

432

### 433 S9. TEM analyses

434 Transmission electron microscopy (TEM) analysis was performed to investigate the morphology  
435 and size of the synthesized ZIF-8 particles. The samples were prepared by dispersing the powders  
436 in water and depositing 2  $\mu\text{L}$  of the suspension onto a carbon-coated copper grid. The images were  
437 acquired using a FEI Tecnai microscope operating at an accelerating voltage of 120 kV.

438

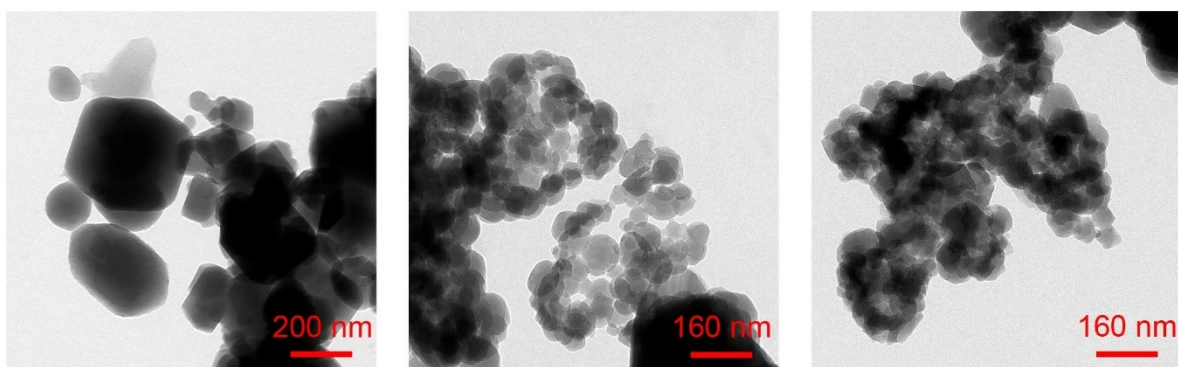

DMC, RT

DMC/MeOH (2:1), RT

DMC/MeOH (1:1), 60 °C

439

440 **Figure S12.** TEM micrographs of the ZIF-8 samples generated using different experimental  
441 conditions (solvent composition and temperature), keeping the reagents and base concentrations  
442 fixed:  $[\text{Zn}^{2+}] = 5 \text{ mM}$ ,  $[\text{Hmin}] = 10 \text{ mM}$ , and  $C_{\text{NaOH}} = 10 \text{ mM}$ .

443

444

445

446

447

448

449

450

451

452

453

454 **References**

- 455 (1) Itatani, M.; Német, N.; Valletti, N.; Schusztter, G.; Prete, P.; Lo Nostro, P.; Cucciniello, R.;  
456 Rossi, F.; Lagzi, I. Synthesis of Zeolitic Imidazolate Framework-8 Using Glycerol  
457 Carbonate. *ACS Sustainable Chem. Eng.* **2023**, *11* (35), 13043–13049.  
458 <https://doi.org/10.1021/acssuschemeng.3c02876>.
- 459 (2) Smallwood, I. M. *Handbook of Organic Solvent Properties*; Halsted Pr. (Wiley): New York,  
460 1996.
- 461 (3) Tatini, D.; Clemente, I.; Ambrosi, M.; Ristori, S.; Ninham, B. W.; Lo Nostro, P. Structuring  
462 Effect of Some Salts on Glycerol Carbonate: A near-Infrared Spectroscopy, Small- and  
463 Wide-Angle X-Ray Scattering Study. *Journal of Molecular Liquids* **2021**, *337*, 116413.  
464 <https://doi.org/10.1016/j.molliq.2021.116413>.
- 465 (4) Sonnati, M. O.; Amigoni, S.; Taffin De Givenchy, E. P.; Darmanin, T.; Choulet, O.;  
466 Guittard, F. Glycerol Carbonate as a Versatile Building Block for Tomorrow: Synthesis,  
467 Reactivity, Properties and Applications. *Green Chem.* **2013**, *15* (2), 283–306.  
468 <https://doi.org/10.1039/C2GC36525A>.
- 469 (5) Tundo, P.; Selva, M. The Chemistry of Dimethyl Carbonate. *Acc. Chem. Res.* **2002**, *35* (9),  
470 706–716. <https://doi.org/10.1021/ar010076f>.
- 471 (6) Park, K. S.; Ni, Z.; Côté, A. P.; Choi, J. Y.; Huang, R.; Uribe-Romo, F. J.; Chae, H. K.;  
472 O’Keeffe, M.; Yaghi, O. M. Exceptional Chemical and Thermal Stability of Zeolitic  
473 Imidazolate Frameworks. *Proc. Natl. Acad. Sci. U.S.A.* **2006**, *103* (27), 10186–10191.  
474 <https://doi.org/10.1073/pnas.0602439103>.
- 475 (7) Russel, W. W. The Adsorption of Gases and Vapors. Volume I: Physical Adsorption  
476 (Brunauer, Stephen). *J. Chem. Educ.* **1944**, *21* (1), 52. <https://doi.org/10.1021/ed021p52.1>.
- 477 (8) Cravillon, J.; Münzer, S.; Lohmeier, S.-J.; Feldhoff, A.; Huber, K.; Wiebcke, M. Rapid  
478 Room-Temperature Synthesis and Characterization of Nanocrystals of a Prototypical Zeolitic  
479 Imidazolate Framework. *Chem. Mater.* **2009**, *21* (8), 1410–1412.  
480 <https://doi.org/10.1021/cm900166h>.
- 481 (9) Yang, X.; Song, T.; Su, T.; Hu, J.; Wu, S. Exploring the Influence of the Reused Methanol  
482 Solution for the Structure and Properties of the Synthesized ZIF-8. *Processes* **2022**, *10* (9),  
483 1705. <https://doi.org/10.3390/pr10091705>.
- 484 (10) Sheldon, R. A. The E Factor at 30: A Passion for Pollution Prevention. *Green Chem.*  
485 **2023**, *25* (5), 1704–1728. <https://doi.org/10.1039/D2GC04747K>.
- 486 (11) Fantoni, T.; Tolomelli, A.; Cabri, W. A Translation of the Twelve Principles of Green  
487 Chemistry to Guide the Development of Cross-Coupling Reactions. *Catalysis Today* **2022**,  
488 *397–399*, 265–271. <https://doi.org/10.1016/j.cattod.2021.09.022>.
- 489 (12) Akhundzadeh Tezerjani, A.; Halladj, R.; Askari, S. Different View of Solvent Effect on  
490 the Synthesis Methods of Zeolitic Imidazolate Framework-8 to Tuning the Crystal Structure  
491 and Properties. *RSC Adv.* **2021**, *11* (32), 19914–19923.  
492 <https://doi.org/10.1039/D1RA02856A>.

493 (13) Kida, K.; Okita, M.; Fujita, K.; Tanaka, S.; Miyake, Y. Formation of High Crystalline  
494 ZIF-8 in an Aqueous Solution. *CrystEngComm* **2013**, *15* (9), 1794.  
495 <https://doi.org/10.1039/c2ce26847g>.  
496 (14) <https://Ecoinvent.Org/> Accessed October 2025.  
497 (15) <https://Simapro.Com/> Accessed October 2025.  
498 (16) Huijbregts, M. A. J.; Steinmann, Z. J. N.; Elshout, P. M. F.; Stam, G.; Verones, F.;  
499 Vieira, M.; Zijp, M.; Hollander, A.; Van Zelm, R. ReCiPe2016: A Harmonised Life Cycle  
500 Impact Assessment Method at Midpoint and Endpoint Level. *Int J Life Cycle Assess* **2017**,  
501 *22* (2), 138–147. <https://doi.org/10.1007/s11367-016-1246-y>.  
502 (17) Gaussian 16, Revision C.01, Frisch, M. J.; Trucks, G. W.; Schlegel, H. B.; Scuseria, G.  
503 E.; Robb, M. A.; Cheeseman, J. R.; Scalmani, G.; Barone, V.; Petersson, G. A.; Nakatsuji,  
504 H.; Li, X.; Caricato, M.; Marenich, A. V.; Bloino, J.; Janesko, B. G.; Gomperts, R.;  
505 Mennucci, B.; Hratchian, H. P.; Ortiz, J. V.; Izmaylov, A. F.; Sonnenberg, J. L.; Williams-  
506 Young, D.; Ding, F.; Lipparini, F.; Egidi, F.; Goings, J.; Peng, B.; Petrone, A.; Henderson,  
507 T.; Ranasinghe, D.; Zakrzewski, V. G.; Gao, J.; Rega, N.; Zheng, G.; Liang, W.; Hada, M.;  
508 Ehara, M.; Toyota, K.; Fukuda, R.; Hasegawa, J.; Ishida, M.; Nakajima, T.; Honda, Y.;  
509 Kitao, O.; Nakai, H.; Vreven, T.; Throssell, K.; Montgomery, J. A., Jr.; Peralta, J. E.;  
510 Ogliaro, F.; Bearpark, M. J.; Heyd, J. J.; Brothers, E. N.; Kudin, K. N.; Staroverov, V. N.;  
511 Keith, T. A.; Kobayashi, R.; Normand, J.; Raghavachari, K.; Rendell, A. P.; Burant, J. C.;  
512 Iyengar, S. S.; Tomasi, J.; Cossi, M.; Millam, J. M.; Klene, M.; Adamo, C.; Cammi, R.;  
513 Ochterski, J. W.; Martin, R. L.; Morokuma, K.; Farkas, O.; Foresman, J. B.; Fox, D. J.  
514 Gaussian, Inc., Wallingford CT, 2016.  
515 (18) Allouche, A. Gabedit—A Graphical User Interface for Computational Chemistry  
516 Softwares. *J Comput Chem* **2011**, *32* (1), 174–182. <https://doi.org/10.1002/jcc.21600>.  
517 (19) Grimme, S.; Antony, J.; Ehrlich, S.; Krieg, H. A Consistent and Accurate *Ab Initio*  
518 Parametrization of Density Functional Dispersion Correction (DFT-D) for the 94 Elements  
519 H-Pu. *The Journal of Chemical Physics* **2010**, *132* (15), 154104.  
520 <https://doi.org/10.1063/1.3382344>.  
521 (20) Hay, P. J.; Wadt, W. R. *Ab Initio* Effective Core Potentials for Molecular Calculations.  
522 Potentials for K to Au Including the Outermost Core Orbitals. *The Journal of Chemical*  
523 *Physics* **1985**, *82* (1), 299–310. <https://doi.org/10.1063/1.448975>.  
524 (21) Da Silva, C. O.; Mennucci, B. The Optical Rotation of Glucose Prototypes: A Local or a  
525 Global Property? *J. Chem. Theory Comput.* **2007**, *3* (1), 62–70.  
526 <https://doi.org/10.1021/ct600250w>.  
527  
528
